# Supplementary material for: Investigation of Genes Encoding Calcineurin B-Like Protein Family in Legumes and Their Expression Analyses in Chickpea (Cicer arietinum L.)
Source: PubMed Central journal article supplement (PMC4390317; doi:10.1371/journal.pone.0123640), 2015-04-08

# S4 (A-I) Fig. Relative expression values of *CaCBL* genes in chickpea

**S4A Fig.** Relative expression values of *CaCBL* genes in different tissues of chickpea analysed by qRT-PCR

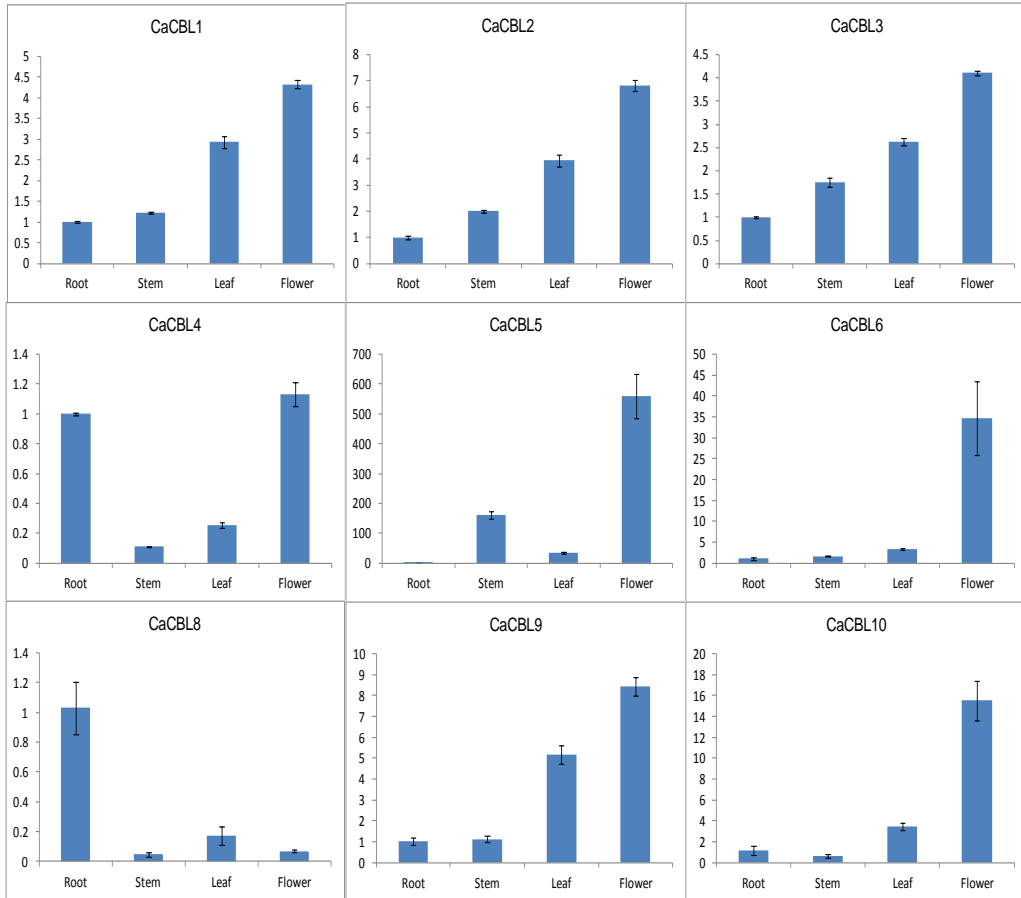

**S4B Fig.** Relative expression values of *CaCBL* genes in chickpea seedlings exposed to 20% PEG for different period analysed by qRT-PCR

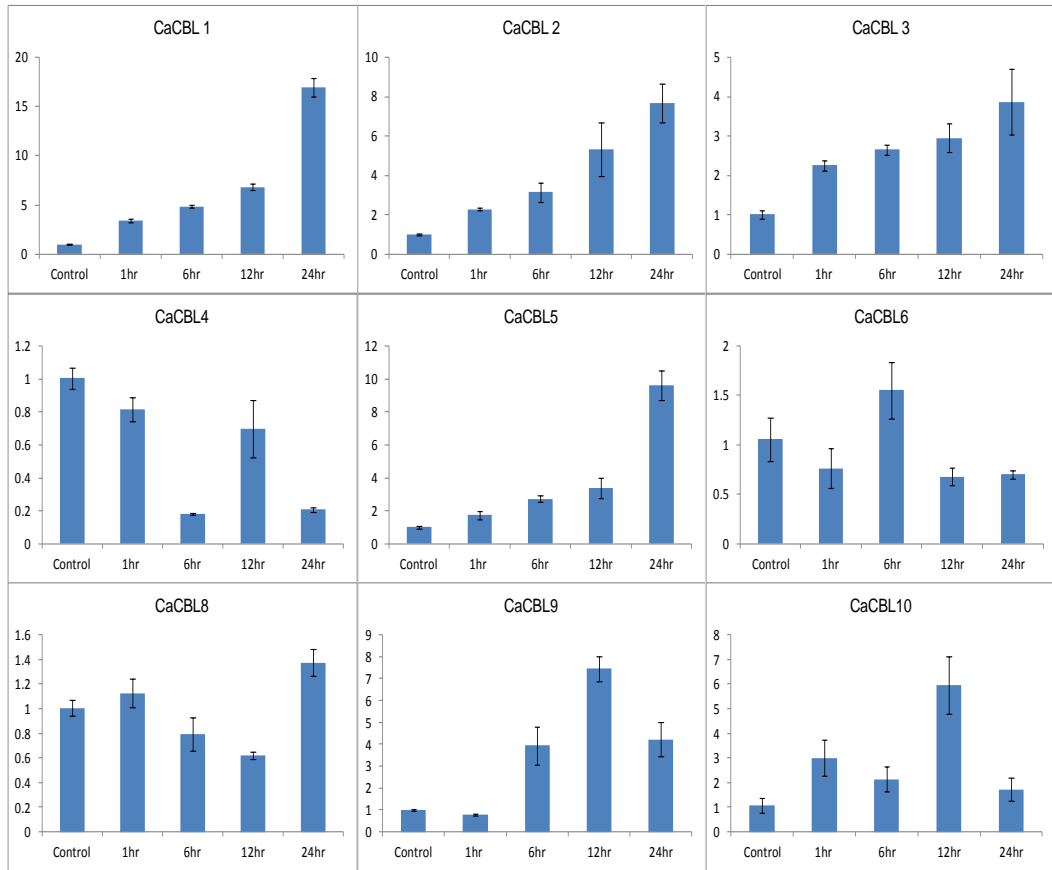

**S4C Fig.** Relative expression values of *CaCBL* genes in chickpea seedlings exposed to 250mM sodium chloride for different period analysed by qRT-PCR

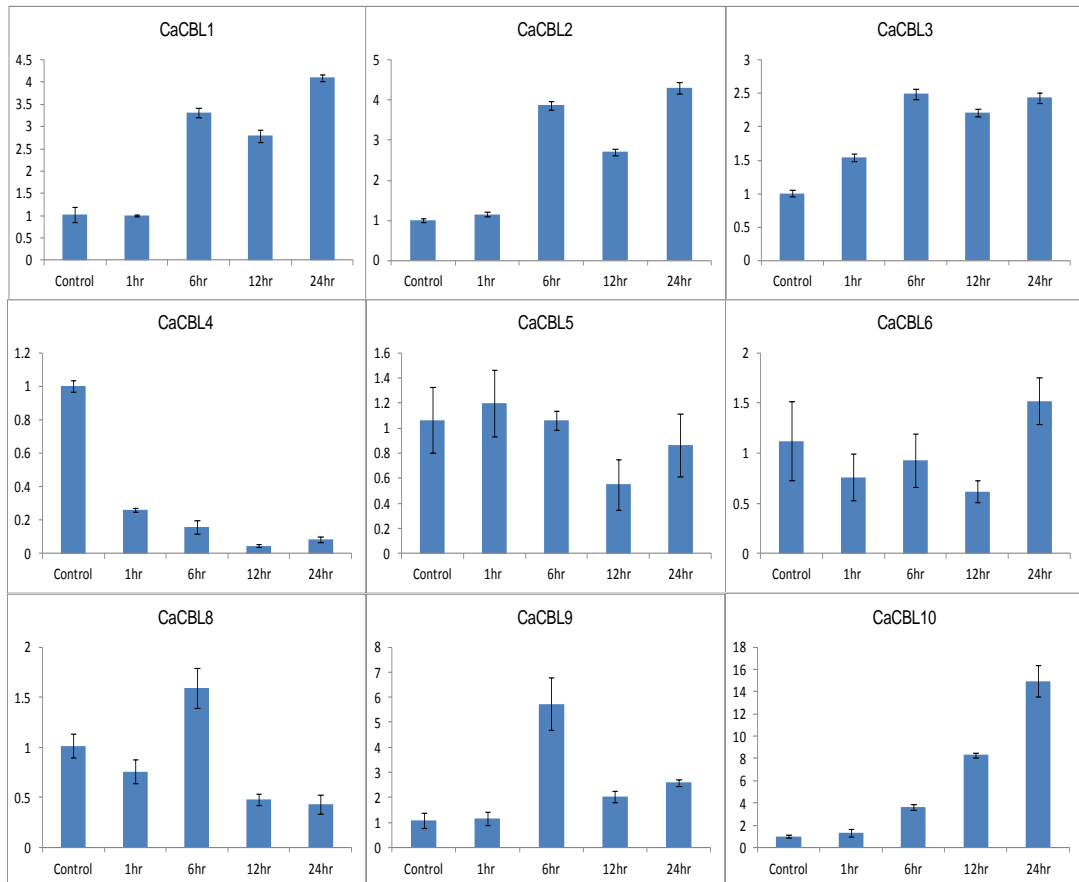

**S4D Fig.** Relative expression values of *CaCBL* genes in chickpea seedlings exposed to 4°C for different period analysed by qRT-PCR

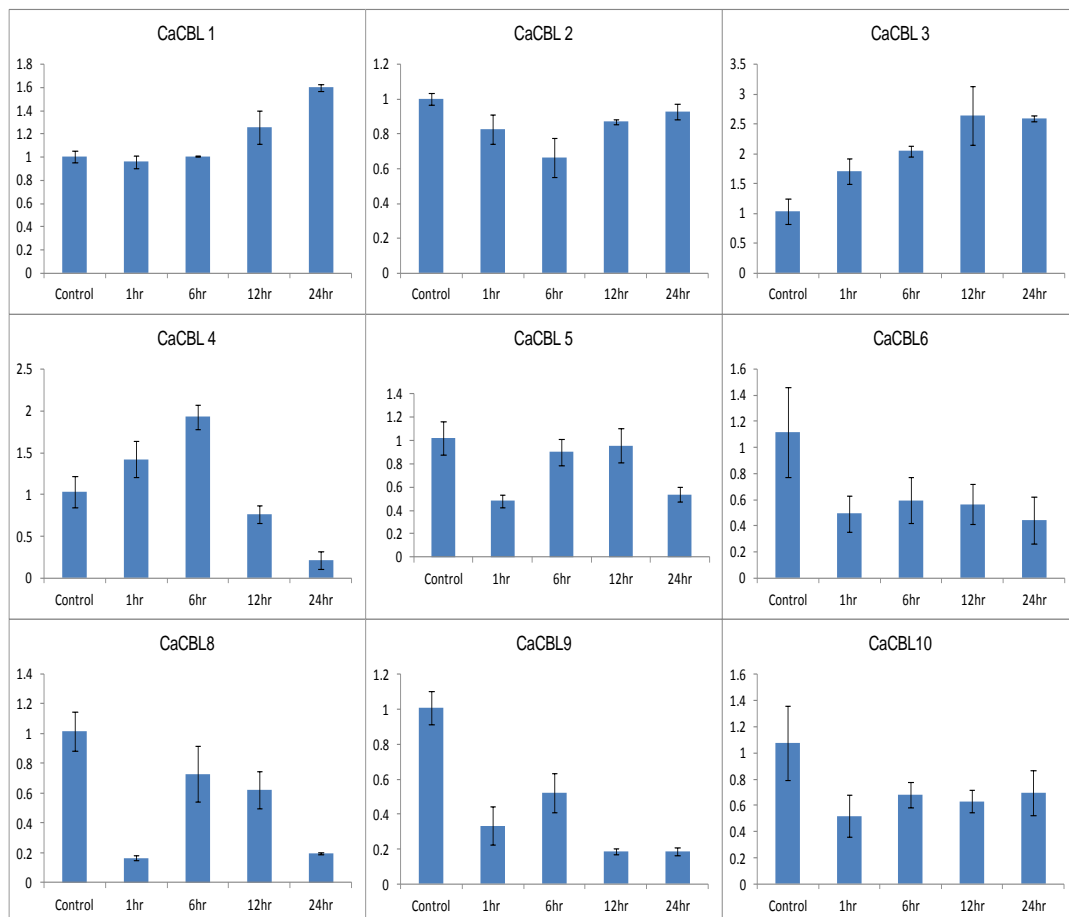

**S4E Fig.** Relative expression values of *CaCBL* genes in chickpea seedlings exposed to ABA (100 $\mu$ M) for different period analysed by qRT-PCR

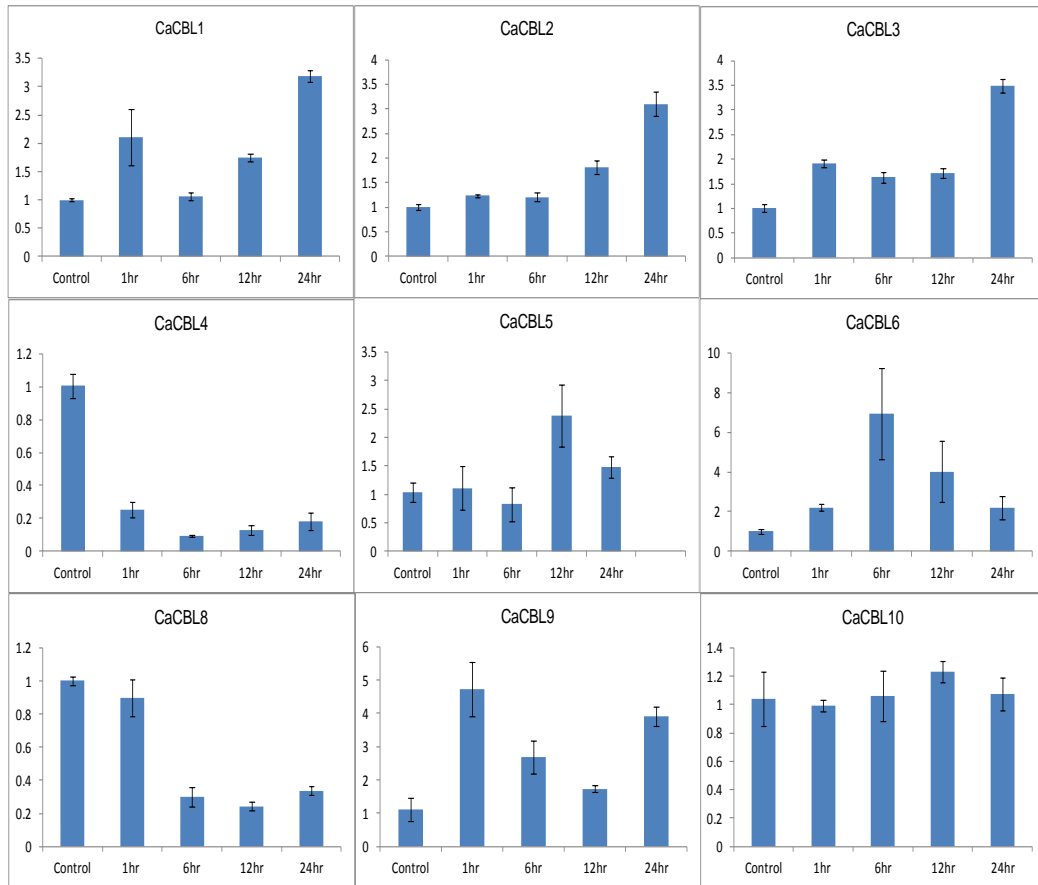

**S4F Fig.** Relative expression values of *CaCBL* genes in chickpea seedlings exposed to BAP (5 $\mu$ M) for different period analysed by qRT-PCR

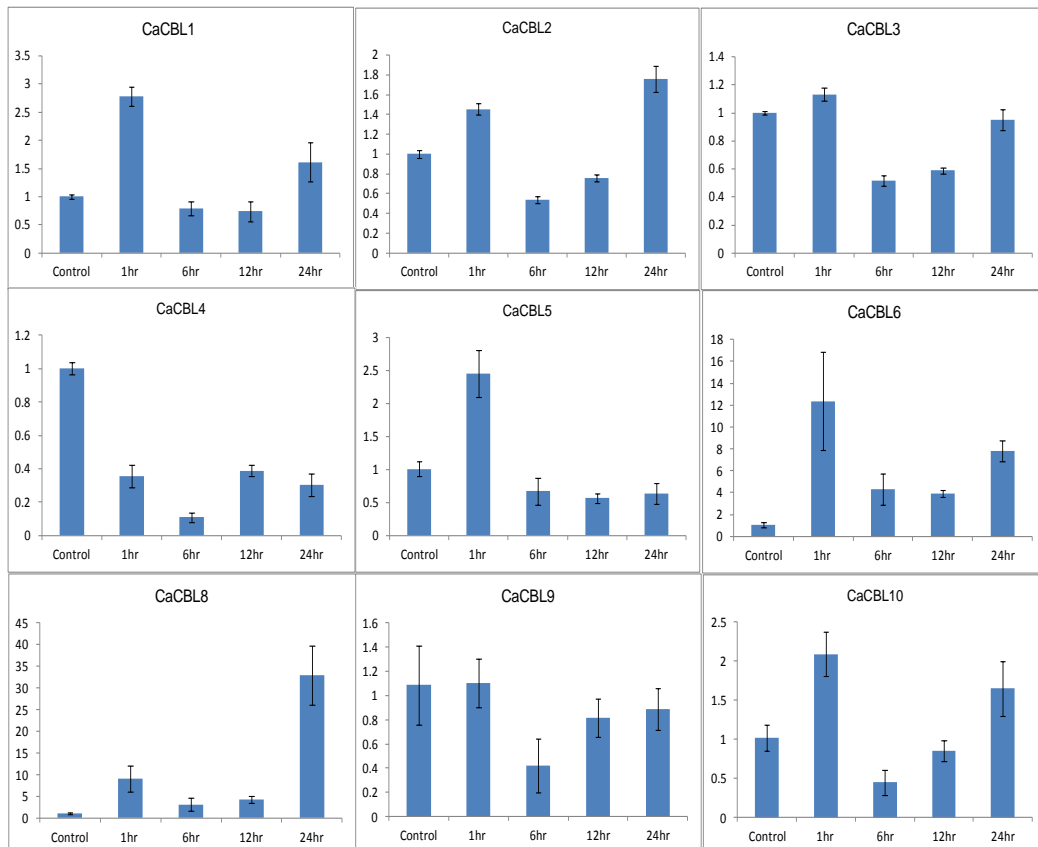

**S4G Fig.** Relative expression values of *CaCBL* genes in chickpea seedlings exposed to IAA (5 $\mu$ M) for different period analysed by qRT-PCR

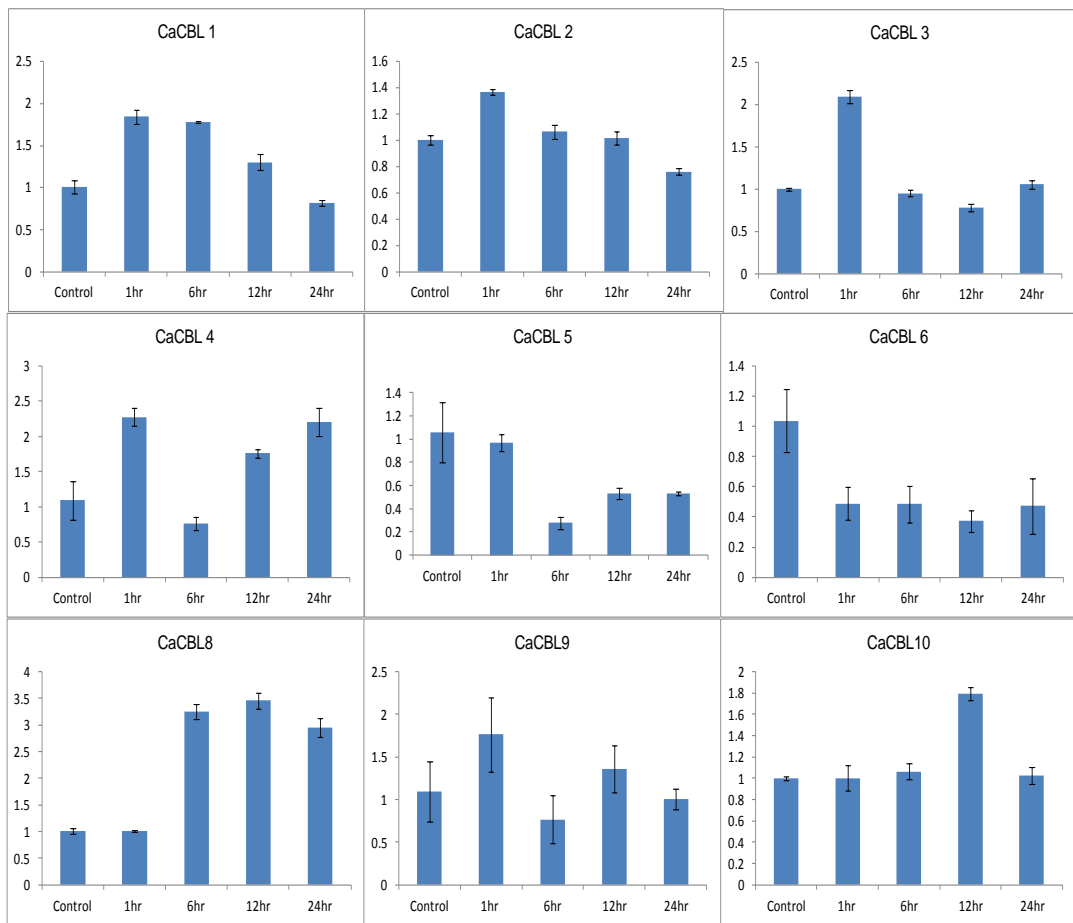

**S4H Fig.** Relative expression values of *CaCBL* genes in chickpea seedlings exposed to methyl jasmonate (100 $\mu$ M) for different period analysed by qRT-PCR

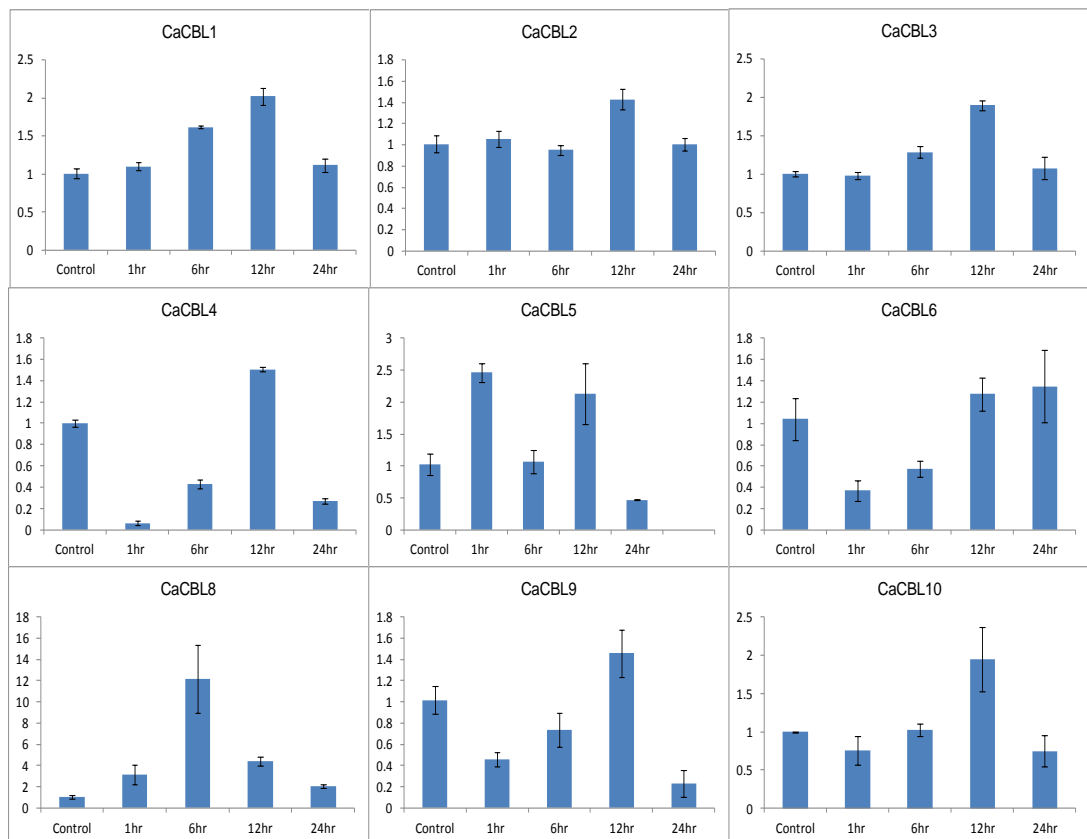

**S4I Fig.** Relative expression values of *CaCBL* genes in chickpea seedlings exposed to salicylic acid (100 $\mu$ M) for different period analysed by qRT-PCR

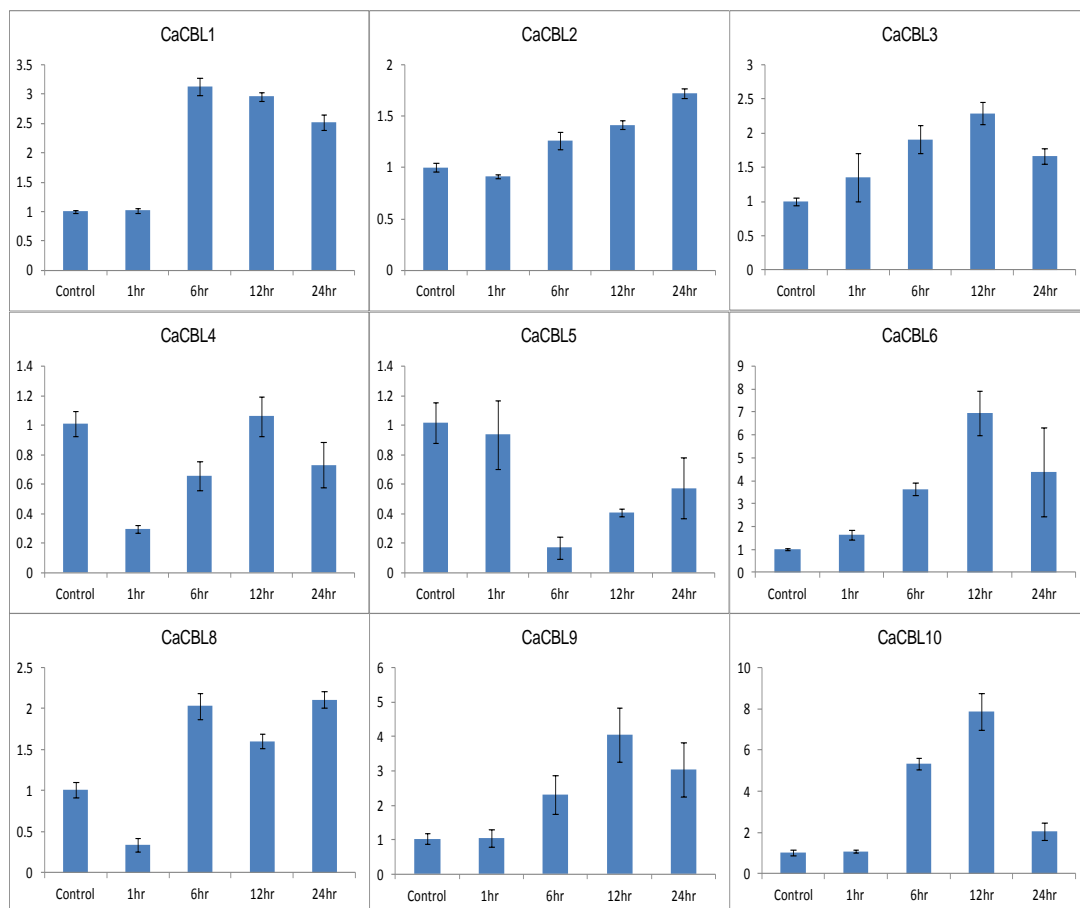

Supplement: pone.0123640.s004.pdf [file pone.0123640.s004.pdf]
