# Supplementary material for: Investigation of Genes Encoding Calcineurin B-Like Protein Family in Legumes and Their Expression Analyses in Chickpea (Cicer arietinum L.)
Source: PubMed Central journal article supplement (PMC4390317; doi:10.1371/journal.pone.0123640), 2015-04-08
Supplement: pone.0123640.s001.pdf [file pone.0123640.s001.pdf]

## S1 Fig. Physical mapping of *CaCBL* genes on chickpea pseudomolecules

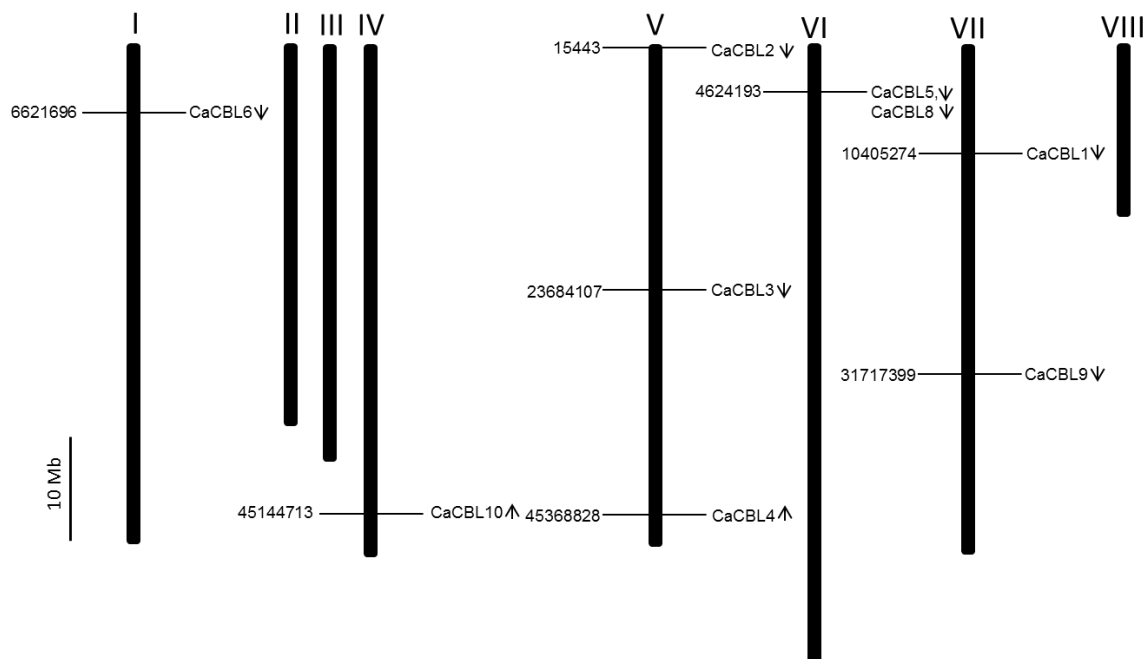

**S1 Fig.** Physical mapping of *CaCBL* genes on chickpea pseudomolecules. The chromosomal position of each *CaCBL* was mapped on kabuli chickpea genome assembly. The arrow next to gene id shows the direction of transcription. The scale represents a 10 Mb chromosomal distance.
