# Supplementary material for: Investigation of Genes Encoding Calcineurin B-Like Protein Family in Legumes and Their Expression Analyses in Chickpea (Cicer arietinum L.)
Source: PubMed Central journal article supplement (PMC4390317; doi:10.1371/journal.pone.0123640), 2015-04-08

S2 Fig. Multiple sequence alignment of CBL genes from various plant species.

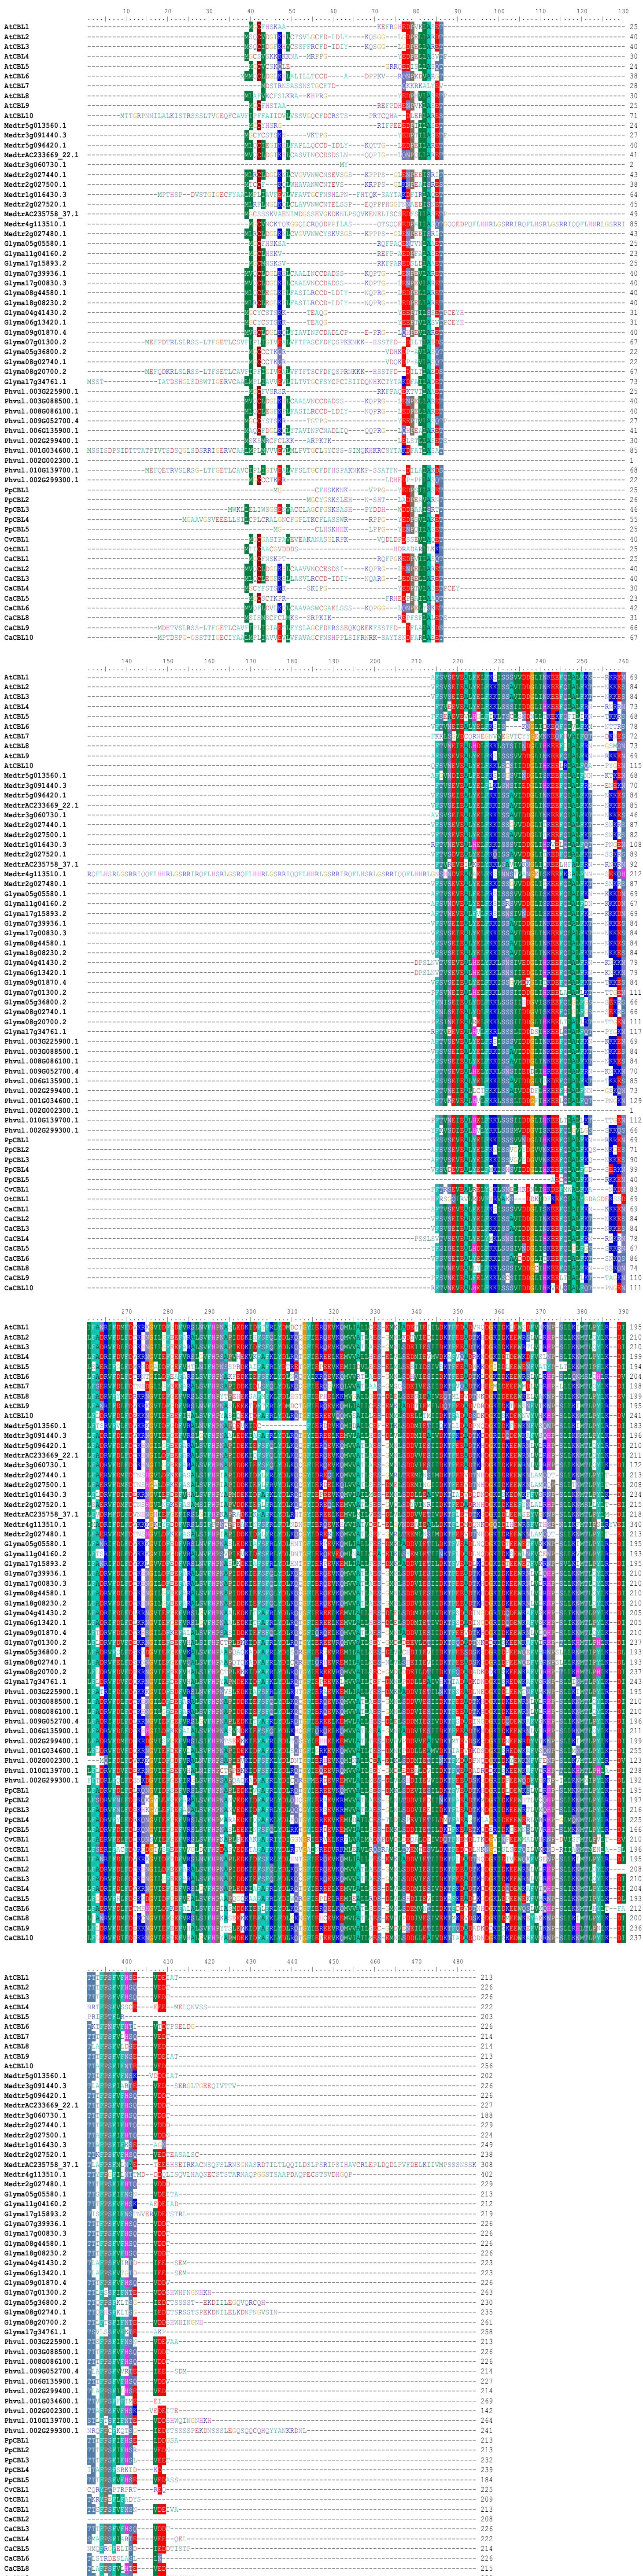

Supplement: pone.0123640.s002.pdf [file pone.0123640.s002.pdf]
