# Supplementary material for: Investigation of Genes Encoding Calcineurin B-Like Protein Family in Legumes and Their Expression Analyses in Chickpea (Cicer arietinum L.)
Source: PubMed Central journal article supplement (PMC4390317; doi:10.1371/journal.pone.0123640), 2015-04-08

**S5(A) Fig.** GO annotation of *CaCBL* genes on the basis of molecular function

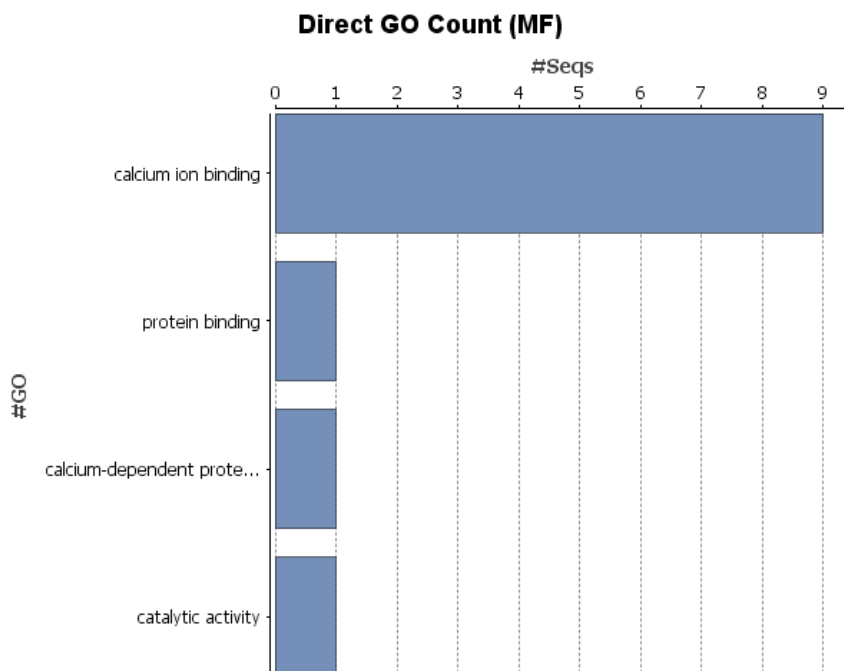

**S5(B) Fig.** GO annotation of *CaCBL* genes on the basis of biological processes

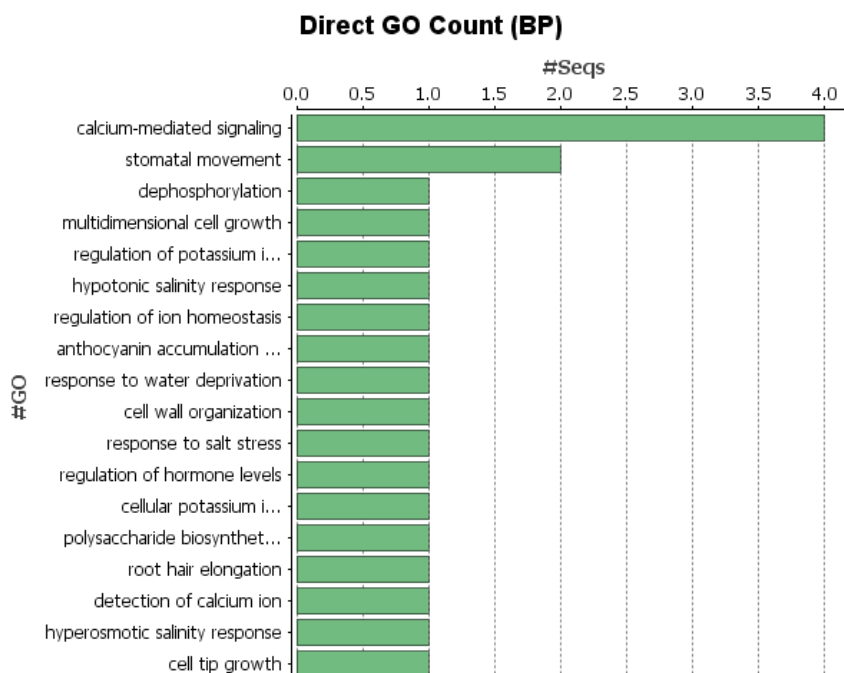

Supplement: pone.0123640.s005.pdf [file pone.0123640.s005.pdf]
